# Supplementary material for: Influence of Na+ and Mg2+ ions on RNA structures studied with molecular dynamics simulations
Source: PubMed Central journal article supplement — Nucleic Acids Res. 2018 Apr 30;46(10):4872–82. doi: 10.1093/nar/gky221 (PMC6007214; doi:10.1093/nar/gky221), 2018-04-30
Supplement: gky221_supp.pdf [file gky221_supp.pdf]

# Influence of Na<sup>+</sup> and Mg<sup>2+</sup> ions on RNA structures studied with molecular dynamics simulations - Supporting Information

Nina M. Fischer<sup>1</sup>, Marcelo D. Polêto<sup>1,2</sup>, Jakob Steuer<sup>1,3</sup> and David van der Spoel<sup>1\*</sup>

<sup>1</sup>Uppsala Centre for Computational Chemistry, Science for Life Laboratory, Department of Cell and Molecular Biology, Uppsala University, Husargatan 3, Box 596, SE-75124 Uppsala, Sweden and <sup>2</sup>Center of Biotechnology, Universidade Federal do Rio Grande do Sul, Bento Gonçalves 9500, BR-91500-970 Porto Alegre, Brazil and <sup>3</sup>Department of Chemistry, University of Konstanz, Universitätstraße 10, D-78457 Konstanz, Germany

Received August 21, 2017; Revised February, 2018; Accepted in 2018

---

\*To whom correspondence should be addressed. Tel: +46 18 471 4205; Fax: +46 018 530396; Email: david.vanderspoel@icm.uu.se

© 2018 The Author(s)

This is an Open Access article distributed under the terms of the Creative Commons Attribution Non-Commercial License (<http://creativecommons.org/licenses/by-nc/2.0/uk/>) which permits unrestricted non-commercial use, distribution, and reproduction in any medium, provided the original work is properly cited.

2 *Nucleic Acids Research*, 2018, Vol. 56, No. 0

**Table S1.** Three numbers, called validation scores (clashscore, backbone, and resolution), that represent the quality of the experimental structure are taken from the Protein Data Bank (PDB, <http://www.rcsb.org/pdb/>). Also the number of water and ions that are added to each system ( $\text{Na}^+_{\text{Cl}}/\text{Na}^+_{\text{PS}}/\text{Mg}^{2+}_{\text{Cl}}/\text{Mg}^{2+}_{\text{PS}}$ ) to be able to run MD simulations are listed.

|       | PDB id         | clashscore | backbone | resolution (Å) | Water | Mg <sup>2+</sup> | Na <sup>+</sup> | Cl <sup>-</sup> |
|-------|----------------|------------|----------|----------------|-------|------------------|-----------------|-----------------|
| X-ray | helical        |            |          |                |       |                  |                 |                 |
|       | 1D4R           | 20         | 0.61     | 2.0            | 29700 | 0/0/26/26        | 52/137/0/85     | 0/85/0/85       |
|       | 1QC0           | 3          | 0.71     | 1.6            | 20900 | 0/0/18/18        | 36/98/0/62      | 0/62/0/62       |
|       | 2QEK           | 1          | 0.82     | 1.8            | 25300 | 0/0/22/22        | 44/118/0/74     | 0/74/0/74       |
|       | 4K31           | 18         | 0.67     | 1.4            | 24200 | 0/0/21/21        | 42/114/0/72     | 0/72/0/72       |
|       | 413D           | 7          | 0.81     | 1.8            | 14300 | 0/0/12/12        | 24/66/0/42      | 0/42/0/42       |
|       | 420D           | 5          | 0.84     | 1.9            | 17600 | 0/0/15/15        | 30/90/0/60      | 0/60/0/60       |
| X-ray | complex folded |            |          |                |       |                  |                 |                 |
|       | 4B5R           | 12         | 0.45     | 2.5            | 51700 | 0/0/47/47        | 93/260/0/167    | 0/167/1/168     |
|       | 4FEJ           | 5          | 0.67     | 1.5            | 36850 | 0/0/33/33        | 66/185/0/119    | 0/119/0/119     |
|       | 4FRG           | 1          | 0.66     | 2.9            | 46200 | 0/0/42/42        | 83/218/0/135    | 0/135/1/136     |
|       | 4JF2           | 4          | 0.68     | 2.3            | 41800 | 0/0/38/38        | 75/194/0/119    | 0/119/1/120     |
|       | 4KQY           | 19         | 0.36     | 3.0            | 65450 | 0/0/59/59        | 118/310/0/192   | 0/192/0/192     |
|       | 4P5J           | 14         | 0.64     | 2.0            | 45640 | 0/0/41/41        | 82/220/0/138    | 0/138/0/138     |
| NMR   | helical        |            |          |                |       |                  |                 |                 |
|       | 1A4D           | 20         | 0.41     |                | 22500 | 0/0/20/20        | 40/106/0/66     | 0/66/0/66       |
|       | 2D18           | 0          | 0.75     |                | 18700 | 0/0/18/18        | 32/90/0/58      | 0/58/0/58       |
|       | 2KYD           | 0          | 0.70     |                | 17600 | 0/0/15/15        | 30/88/0/58      | 0/58/0/58       |
|       | 2L2J           | 0          | 0.75     |                | 23100 | 0/0/21/21        | 41/108/0/67     | 0/67/1/68       |
|       | 2LPS           | 0          | 0.64     |                | 18700 | 0/0/17/17        | 33/88/0/55      | 0/55/1/56       |
|       | 2LV0           | 0          | 0.64     |                | 13200 | 0/0/12/12        | 23/68/0/45      | 0/45/1/46       |
| NMR   | complex folded |            |          |                |       |                  |                 |                 |
|       | 1YMO           | 118        | 0.11     |                | 25820 | 0/0/23/23        | 46/121/0/75     | 0/75/0/75       |
|       | 2ADT           | 56         | 0.34     |                | 47300 | 0/0/42/42        | 84/225/0/141    | 0/141/0/141     |
|       | 2LKR           | 76         | 0.10     |                | 61050 | 0/0/55/55        | 110/285/0/175   | 0/175/0/175     |
|       | 2MHI           | 134        | 0.08     |                | 29150 | 0/0/26/26        | 52/150/0/98     | 0/98/0/98       |
|       | 2MTK           | 24         | 0.31     |                | 25850 | 0/0/23/23        | 46/119/0/73     | 0/73/0/73       |
|       | 2M8K           | 84         | 0.11     |                | 26400 | 0/0/24/24        | 47/123/0/76     | 0/76/1/77       |

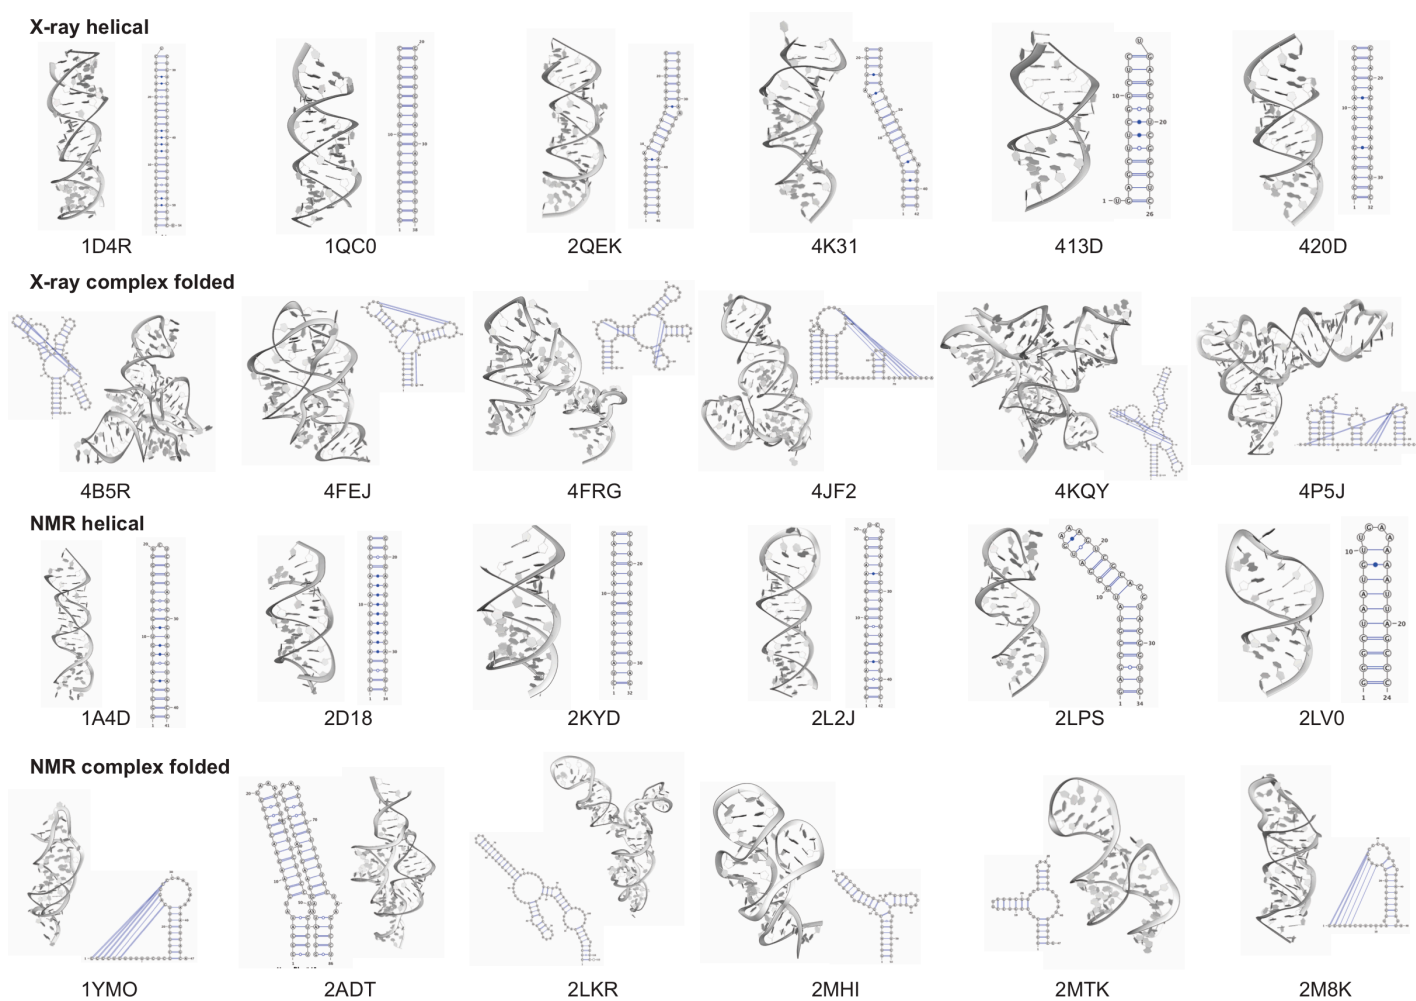

**Figure S1.** Secondary and three-dimensional structures of each RNA is given. The structures are grouped in the four groups used throughout the manuscript: X-ray helical, X-ray complex folded, NMR helical, NMR complex folded. Secondary structures are obtained using the visualization software VARNA (v3.9) with dot-bracket-notation obtained from x3dna-dssr (v1.7.3). Three-dimensional structures are visualized with BALLView.

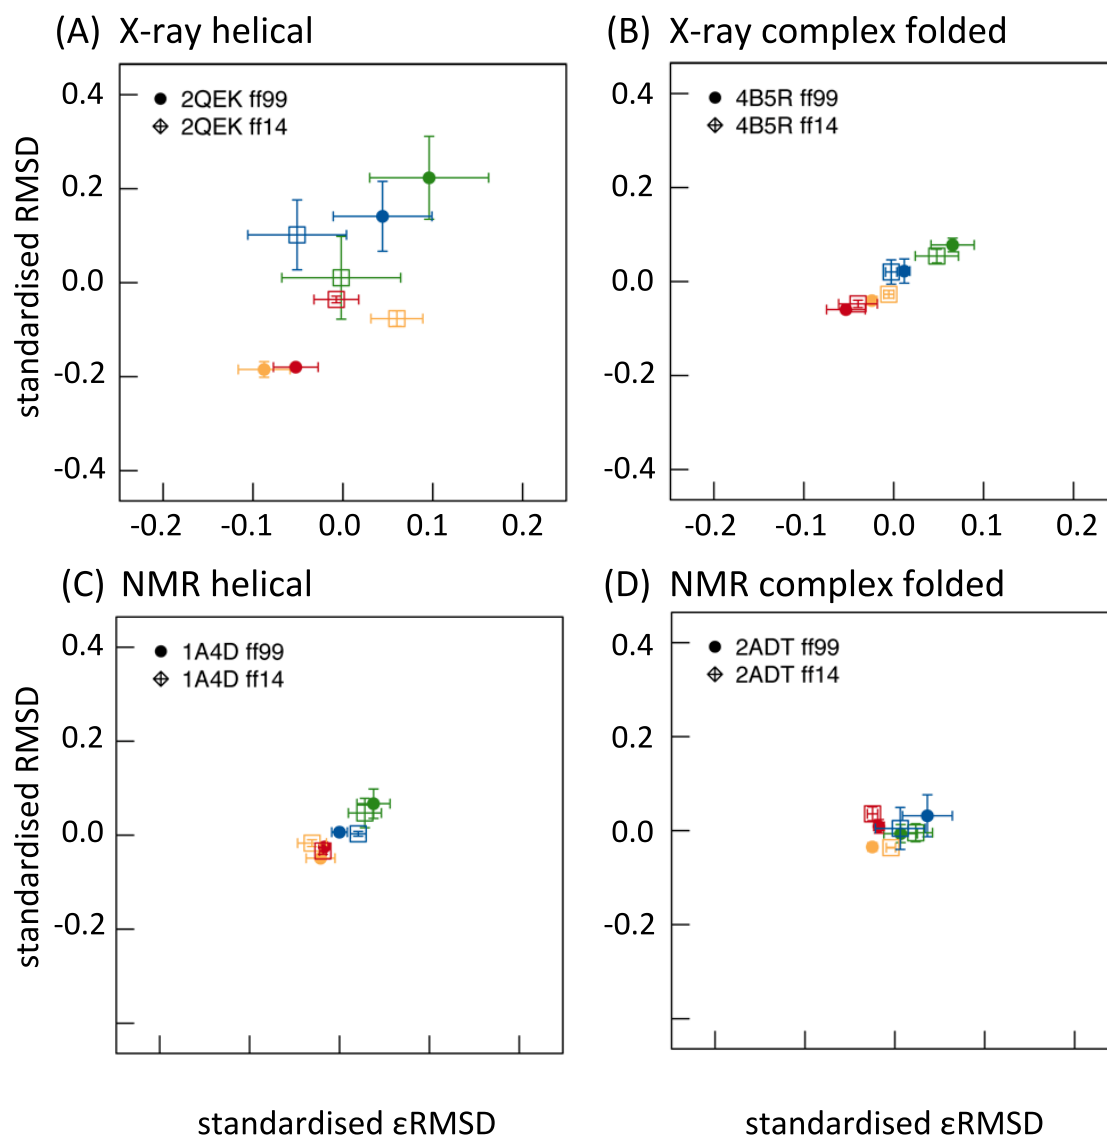

**Figure S2.** Standardised mean RMSD (nm) values are plotted against standardised mean  $\epsilon$ RMSD values for four RNA structure. RMSD and  $\epsilon$ RMSD values for helical X-ray and NMR as well as for complex folded X-ray and NMR structures are obtained during the production run for each replica and each system. Instead of comparing different RNA structures, we compare here two force fields: ff99 with parameter set parm99 (solid dots) and ff14 with parameter set parmOL combined with parmbsc0 (squares). The four systems are shown in different colors (as in Fig. 1): Na<sup>+</sup><sub>Cl</sub> (green), Na<sup>+</sup><sub>PS</sub> (blue), Mg<sup>2+</sup><sub>Cl</sub> (orange), Mg<sup>2+</sup><sub>PS</sub> (red).

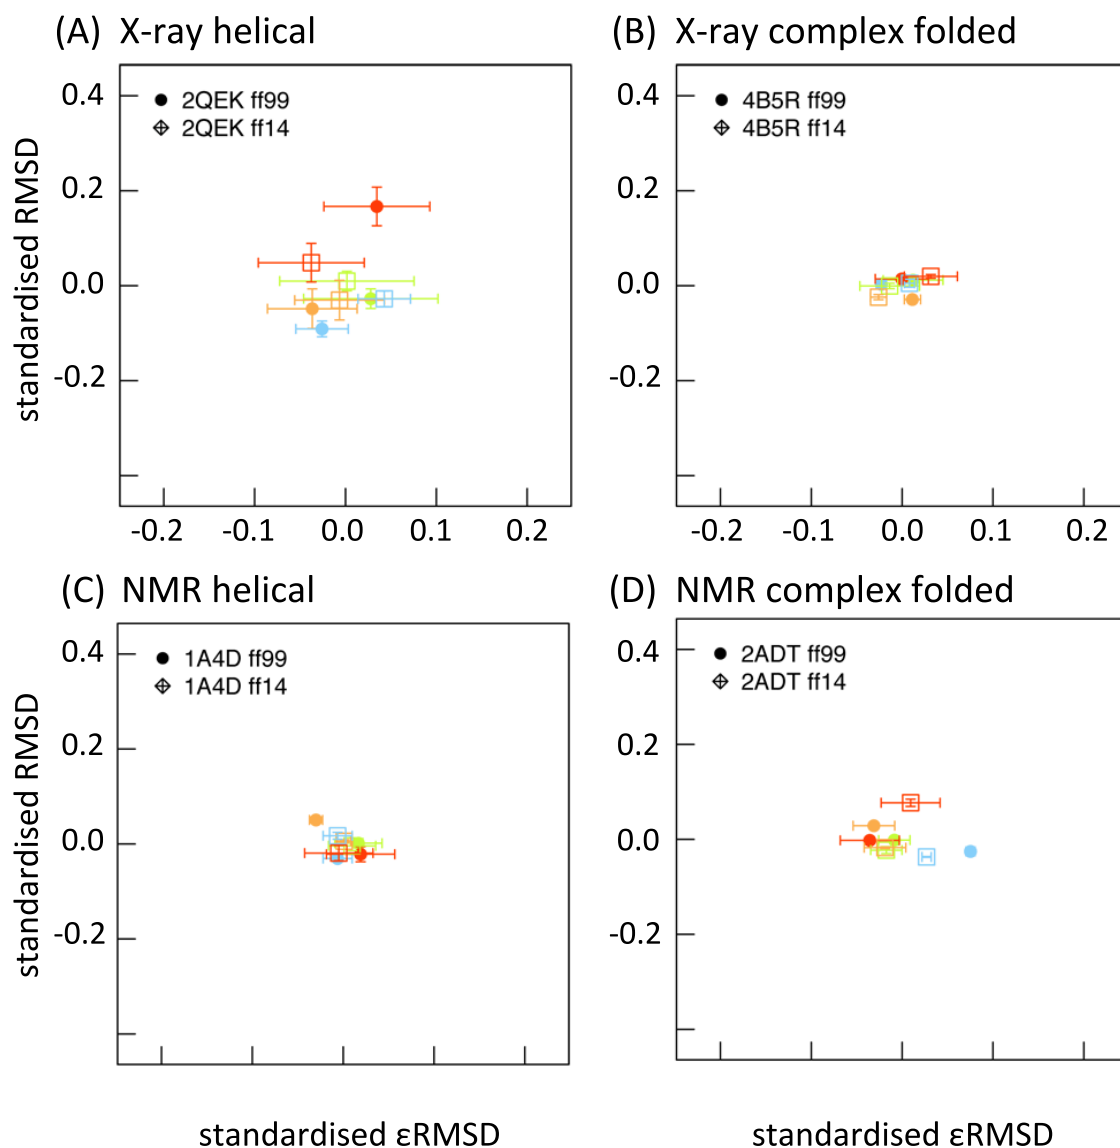

**Figure S3.** Standardised mean RMSD (nm) values are plotted against standardised mean εRMSD values for four RNA structure. RMSD and εRMSD values for helical X-ray and NMR as well as for complex folded X-ray and NMR structures are obtained during the production run for each replica and each system. Instead of comparing different RNA structures, we compare here two force fields: ff99 with parameter set parm99 (solid dots) and ff14 with parameter set parmOL combined with parmbsc0 (squares). Here, we also used K<sup>+</sup> instead of Na<sup>+</sup> and indicate this with lighter colors compared to Fig. 1 or Fig. S2. The four systems are shown in different colors: Na<sup>+</sup><sub>Cl</sub> (green), Na<sup>+</sup><sub>PS</sub> (blue), Mg<sup>2+</sup><sub>Cl</sub> (orange), Mg<sup>2+</sup><sub>PS</sub> (red).

6 *Nucleic Acids Research*, 2018, Vol. 56, No. 0

**Table S2.** The average  $\epsilon$ RMSD values with errors and the maximum  $\epsilon$ RMSD value are determined for all three replicas in one system.

| PDB id | Na <sup>+</sup>      |      | Na <sup>+</sup> and NaCl |      | Mg <sup>2+</sup>     |      | Mg <sup>2+</sup> and NaCl |      |  |
|--------|----------------------|------|--------------------------|------|----------------------|------|---------------------------|------|--|
|        | mean $\epsilon$ RMSD | max  | mean $\epsilon$ RMSD     | max  | mean $\epsilon$ RMSD | max  | mean $\epsilon$ RMSD      | max  |  |
| X-ray  | helical              |      |                          |      |                      |      |                           |      |  |
| 1D4R   | 0.92±0.12            | 1.37 | 0.96±0.12                | 1.38 | 0.80±0.10            | 1.05 | 0.92±0.10                 | 1.23 |  |
| 1QC0   | 0.49±0.04            | 0.77 | 0.48±0.04                | 0.66 | 0.51±0.06            | 0.78 | 0.47±0.04                 | 0.67 |  |
| 2QEK   | 0.98±0.11            | 1.39 | 0.92±0.07                | 1.25 | 0.79±0.05            | 1.01 | 0.83±0.04                 | 1.08 |  |
| 4K31   | 0.64±0.05            | 0.85 | 0.62±0.05                | 0.88 | 0.71±0.07            | 0.98 | 0.67±0.05                 | 0.96 |  |
| 413D   | 0.80±0.07            | 1.11 | 0.83±0.12                | 1.44 | 0.67±0.08            | 0.98 | 0.67±0.09                 | 1.01 |  |
| 420D   | 0.69±0.10            | 1.12 | 0.63±0.05                | 0.88 | 0.60±0.07            | 1.01 | 0.56±0.05                 | 0.86 |  |
| X-ray  | complex folded       |      |                          |      |                      |      |                           |      |  |
| 4B5R   | 0.86±0.03            | 0.98 | 0.80±0.05                | 0.99 | 0.77±0.04            | 0.92 | 0.74±0.06                 | 0.92 |  |
| 4FEJ   | 0.98±0.06            | 1.30 | 0.93±0.07                | 1.26 | 0.84±0.11            | 1.12 | 0.75±0.07                 | 1.00 |  |
| 4FRG   | 0.79±0.08            | 1.03 | 0.76±0.04                | 0.97 | 0.74±0.06            | 0.88 | 0.70±0.05                 | 0.88 |  |
| 4JF2   | 0.88±0.04            | 1.11 | 0.83±0.07                | 1.08 | 0.78±0.05            | 0.99 | 0.77±0.06                 | 1.04 |  |
| 4KQY   | 0.91±0.09            | 1.12 | 0.86±0.07                | 1.08 | 0.86±0.07            | 1.00 | 0.78±0.06                 | 0.97 |  |
| 4P5J   | 0.78±0.04            | 0.92 | 0.85±0.06                | 1.00 | 0.72±0.05            | 0.86 | 0.83±0.04                 | 0.99 |  |
| NMR    | helical              |      |                          |      |                      |      |                           |      |  |
| 1A4D   | 0.80±0.06            | 1.08 | 0.77±0.06                | 0.99 | 0.74±0.06            | 0.95 | 0.75±0.06                 | 0.95 |  |
| 2D18   | 1.10±0.12            | 1.44 | 1.14±0.10                | 1.56 | 0.99±0.10            | 1.26 | 0.91±0.09                 | 1.24 |  |
| 2KYD   | 0.60±0.06            | 1.07 | 0.59±0.15                | 1.15 | 0.47±0.05            | 0.72 | 0.47±0.06                 | 0.86 |  |
| 2L2J   | 0.67±0.08            | 0.99 | 0.58±0.04                | 0.82 | 0.59±0.04            | 0.79 | 0.59±0.05                 | 0.84 |  |
| 2LPS   | 0.93±0.08            | 1.27 | 0.90±0.12                | 1.22 | 0.68±0.09            | 1.00 | 0.64±0.09                 | 1.02 |  |
| 2LV0   | 0.98±0.08            | 1.30 | 1.03±0.05                | 1.29 | 0.85±0.10            | 1.31 | 0.92±0.06                 | 1.17 |  |
| NMR    | complex folded       |      |                          |      |                      |      |                           |      |  |
| 1YMO   | 1.28±0.04            | 1.46 | 1.38±0.08                | 1.70 | 1.28±0.04            | 1.53 | 1.33±0.05                 | 1.54 |  |
| 2ADT   | 0.96±0.03            | 1.12 | 0.99±0.03                | 1.14 | 0.93±0.03            | 1.06 | 0.94±0.02                 | 1.05 |  |
| 2LKR   | 1.53±0.04            | 1.68 | 1.44±0.04                | 1.60 | 1.49±0.05            | 1.66 | 1.45±0.03                 | 1.59 |  |
| 2MHI   | 1.44±0.04            | 1.57 | 1.45±0.07                | 1.66 | 1.43±0.04            | 1.55 | 1.44±0.05                 | 1.72 |  |
| 2MTK   | 1.14±0.07            | 1.37 | 1.04±0.03                | 1.23 | 1.00±0.05            | 1.21 | 0.97±0.05                 | 1.19 |  |
| 2M8K   | 1.05±0.05            | 1.23 | 1.08±0.04                | 1.25 | 1.07±0.04            | 1.30 | 1.02±0.06                 | 1.26 |  |

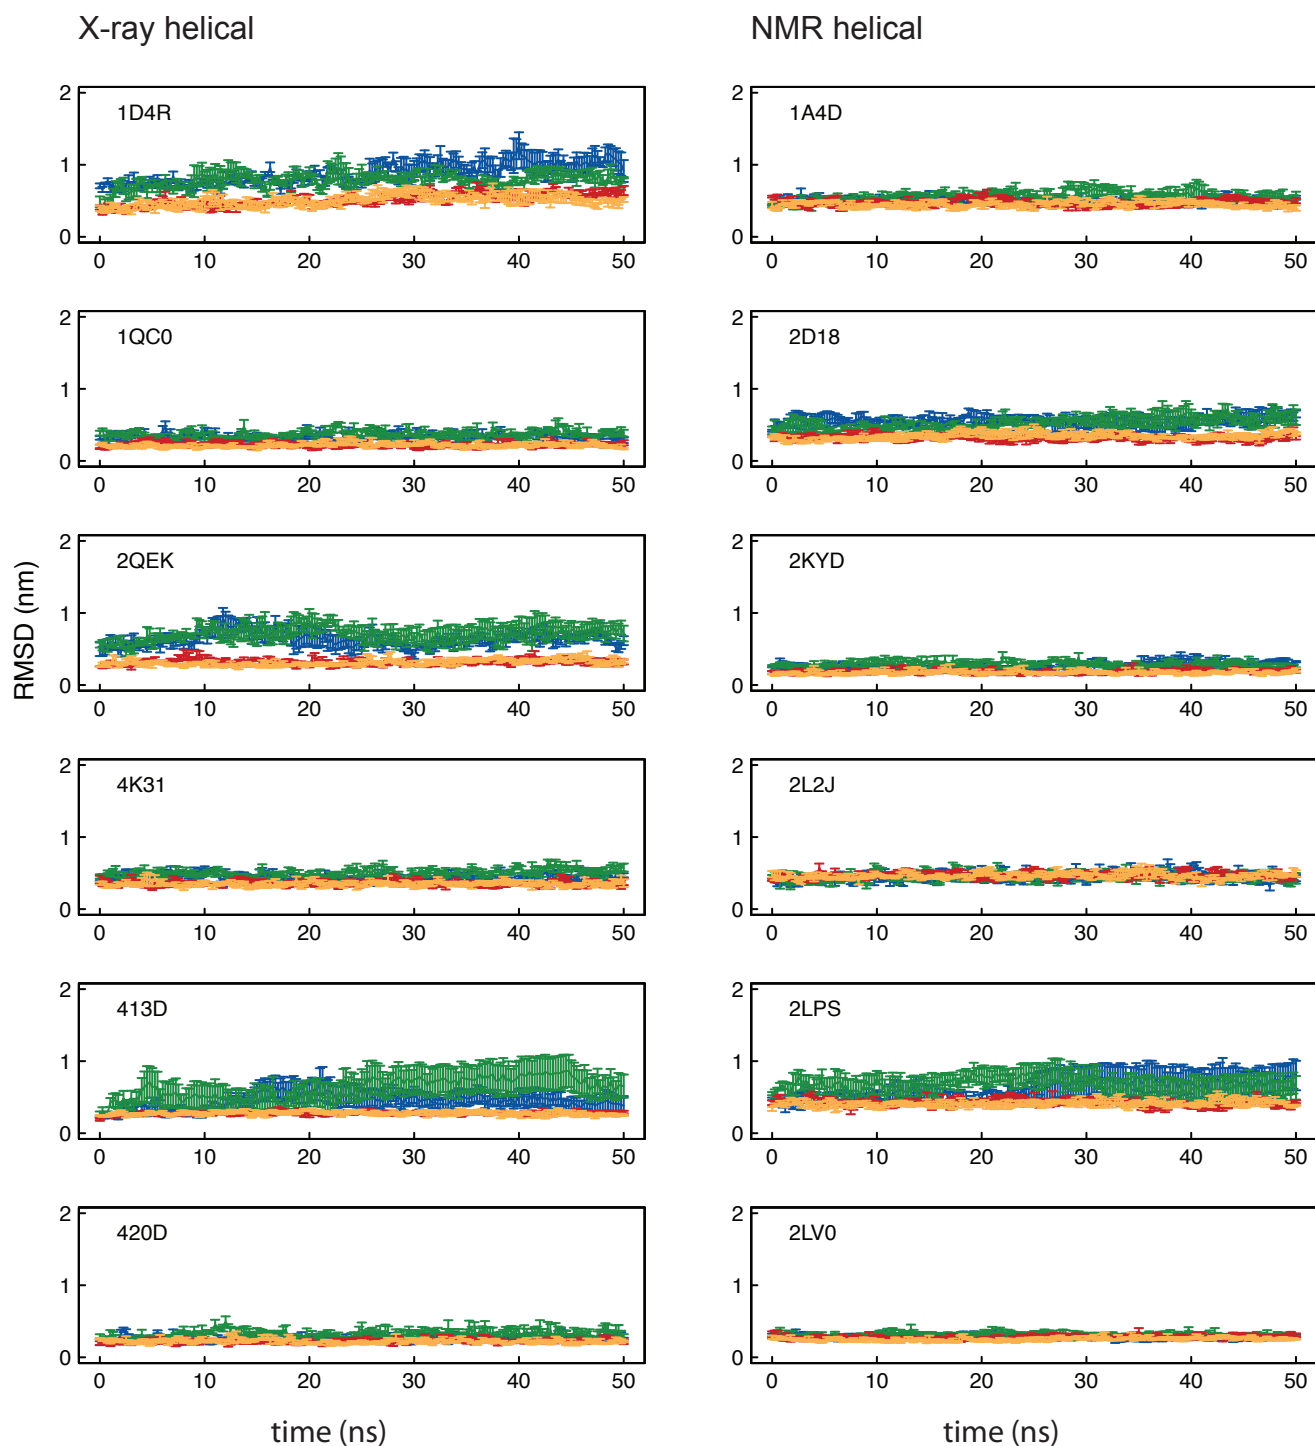

**Figure S4.** RMSD values are calculated to the original PDB structure over 50 ns production runs for three replicas in each system. The average RMSD and its error are shown for each helical RNA obtained by X-ray or NMR. The four systems are shown in different colors (as in Fig. 1): Na<sup>+</sup><sub>Cl</sub> (green), Na<sup>+</sup><sub>PS</sub> (blue), Mg<sup>2+</sup><sub>Cl</sub> (orange), Mg<sup>2+</sup><sub>PS</sub> (red).

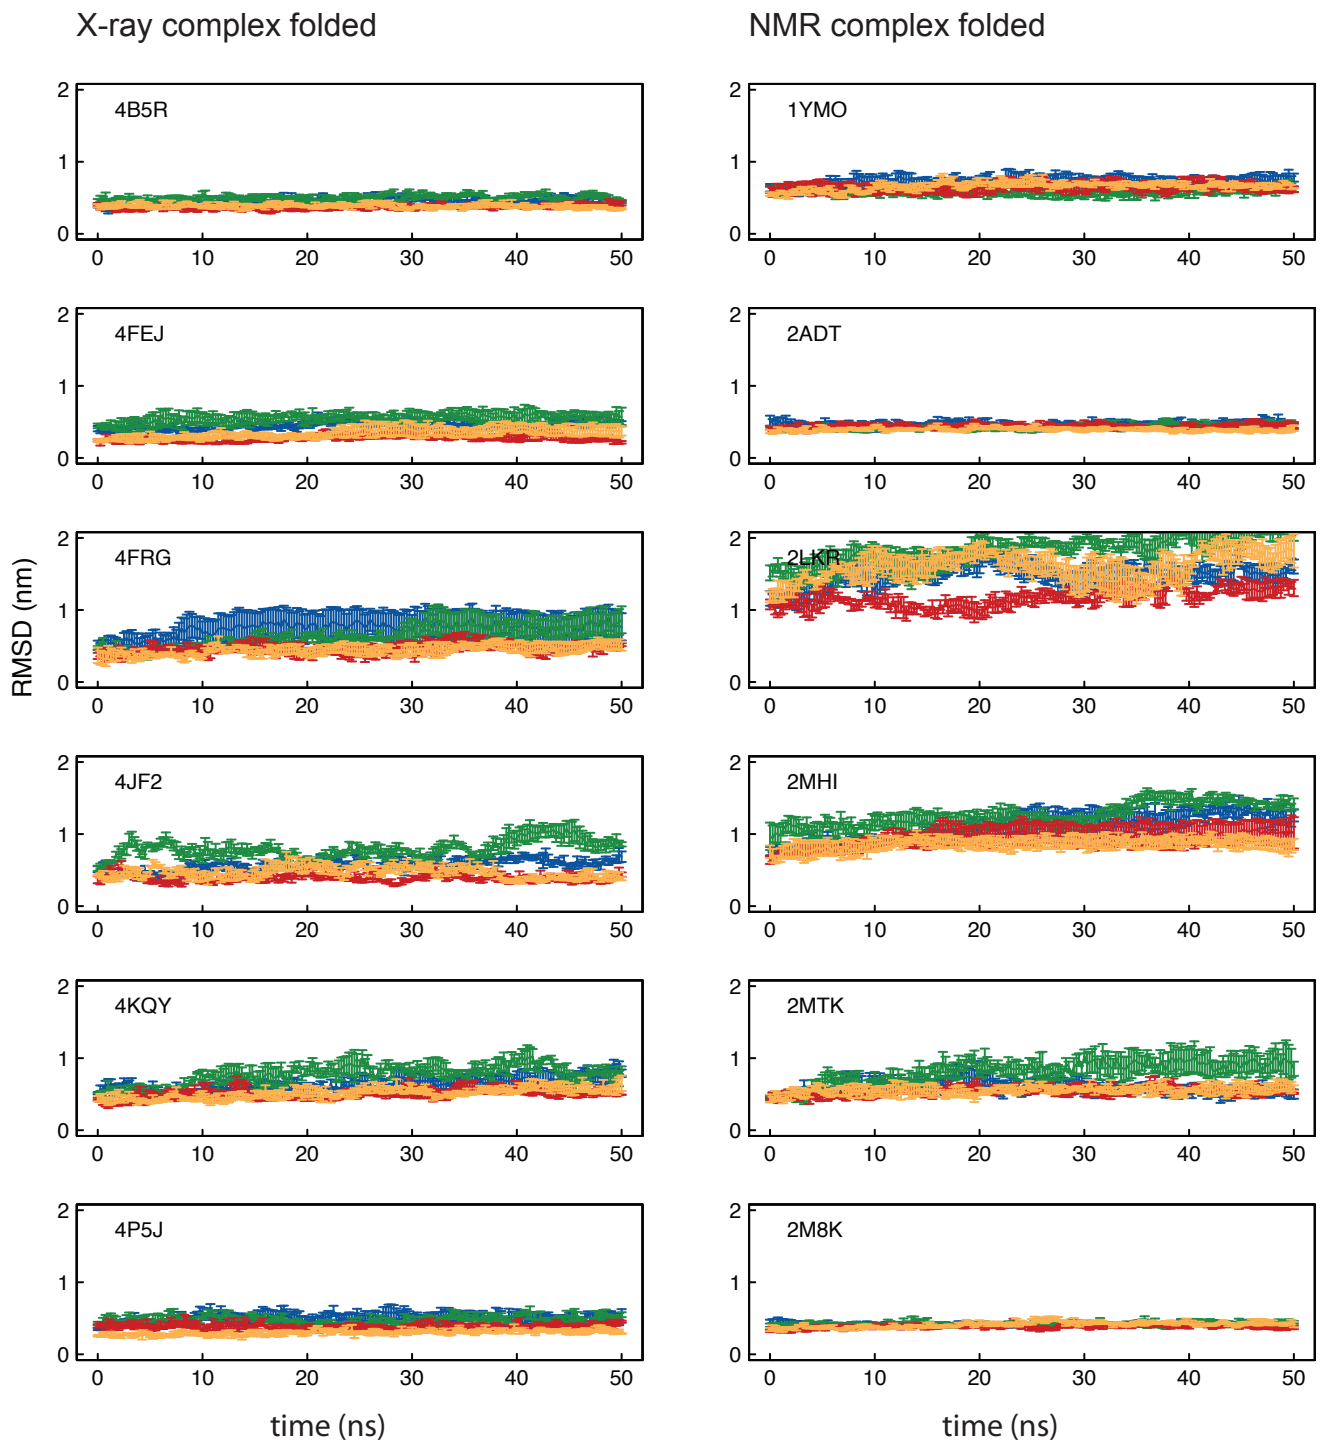

**Figure S5.** RMSD values are calculated to the original PDB structure over 50 ns production runs for three replicas in each system. The average RMSD and its error are shown for each complex folded RNA obtained by X-ray or NMR. The four systems are shown in different colors (as in Fig. 1):  $\text{Na}^+_{\text{Cl}}$  (green),  $\text{Na}^+_{\text{PS}}$  (blue),  $\text{Mg}^{2+}_{\text{Cl}}$  (orange),  $\text{Mg}^{2+}_{\text{PS}}$  (red).



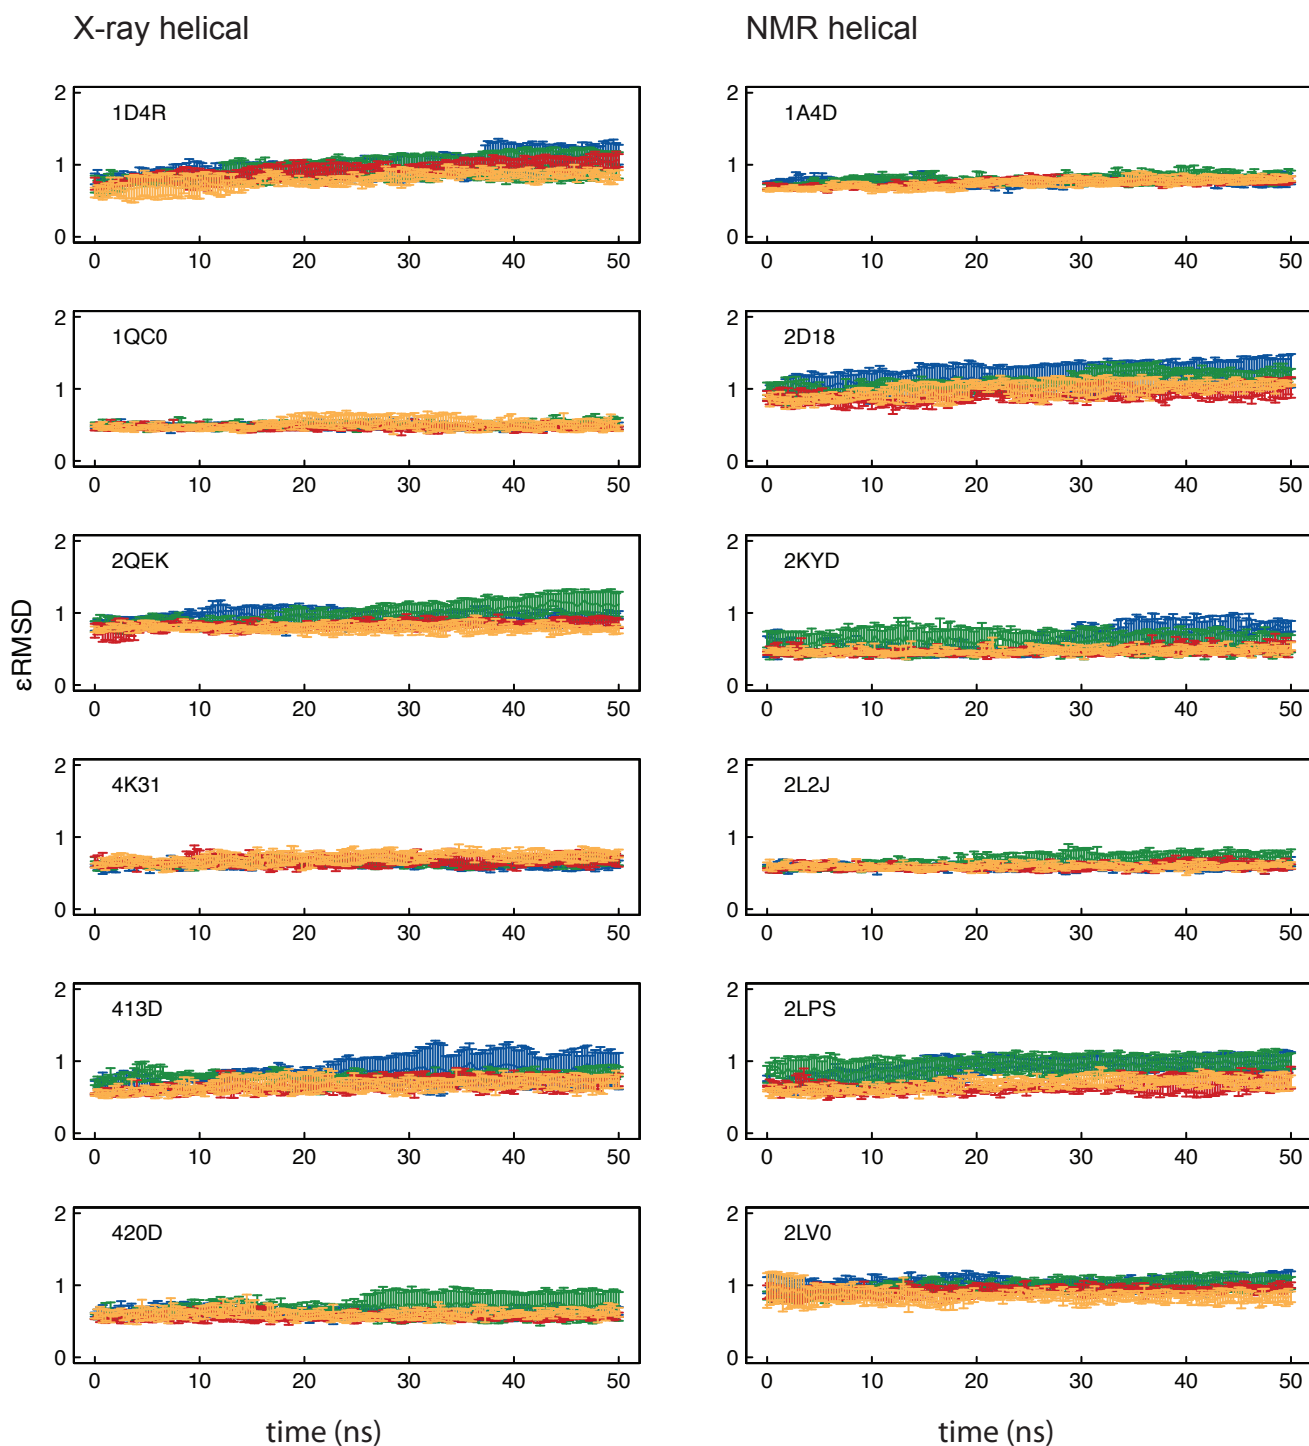

**Figure S6.**  $\epsilon$ RMSD values are calculated to the original PDB structure over 50 ns production runs for three replicas in each system. The average  $\epsilon$ RMSD and its error are shown for each helical RNA obtained by X-ray or NMR. The four systems are shown in different colors (as in Fig. 1):  $\text{Na}^+_{\text{Cl}}$  (green),  $\text{Na}^+_{\text{PS}}$  (blue),  $\text{Mg}^{2+}_{\text{Cl}}$  (orange),  $\text{Mg}^{2+}_{\text{PS}}$  (red).

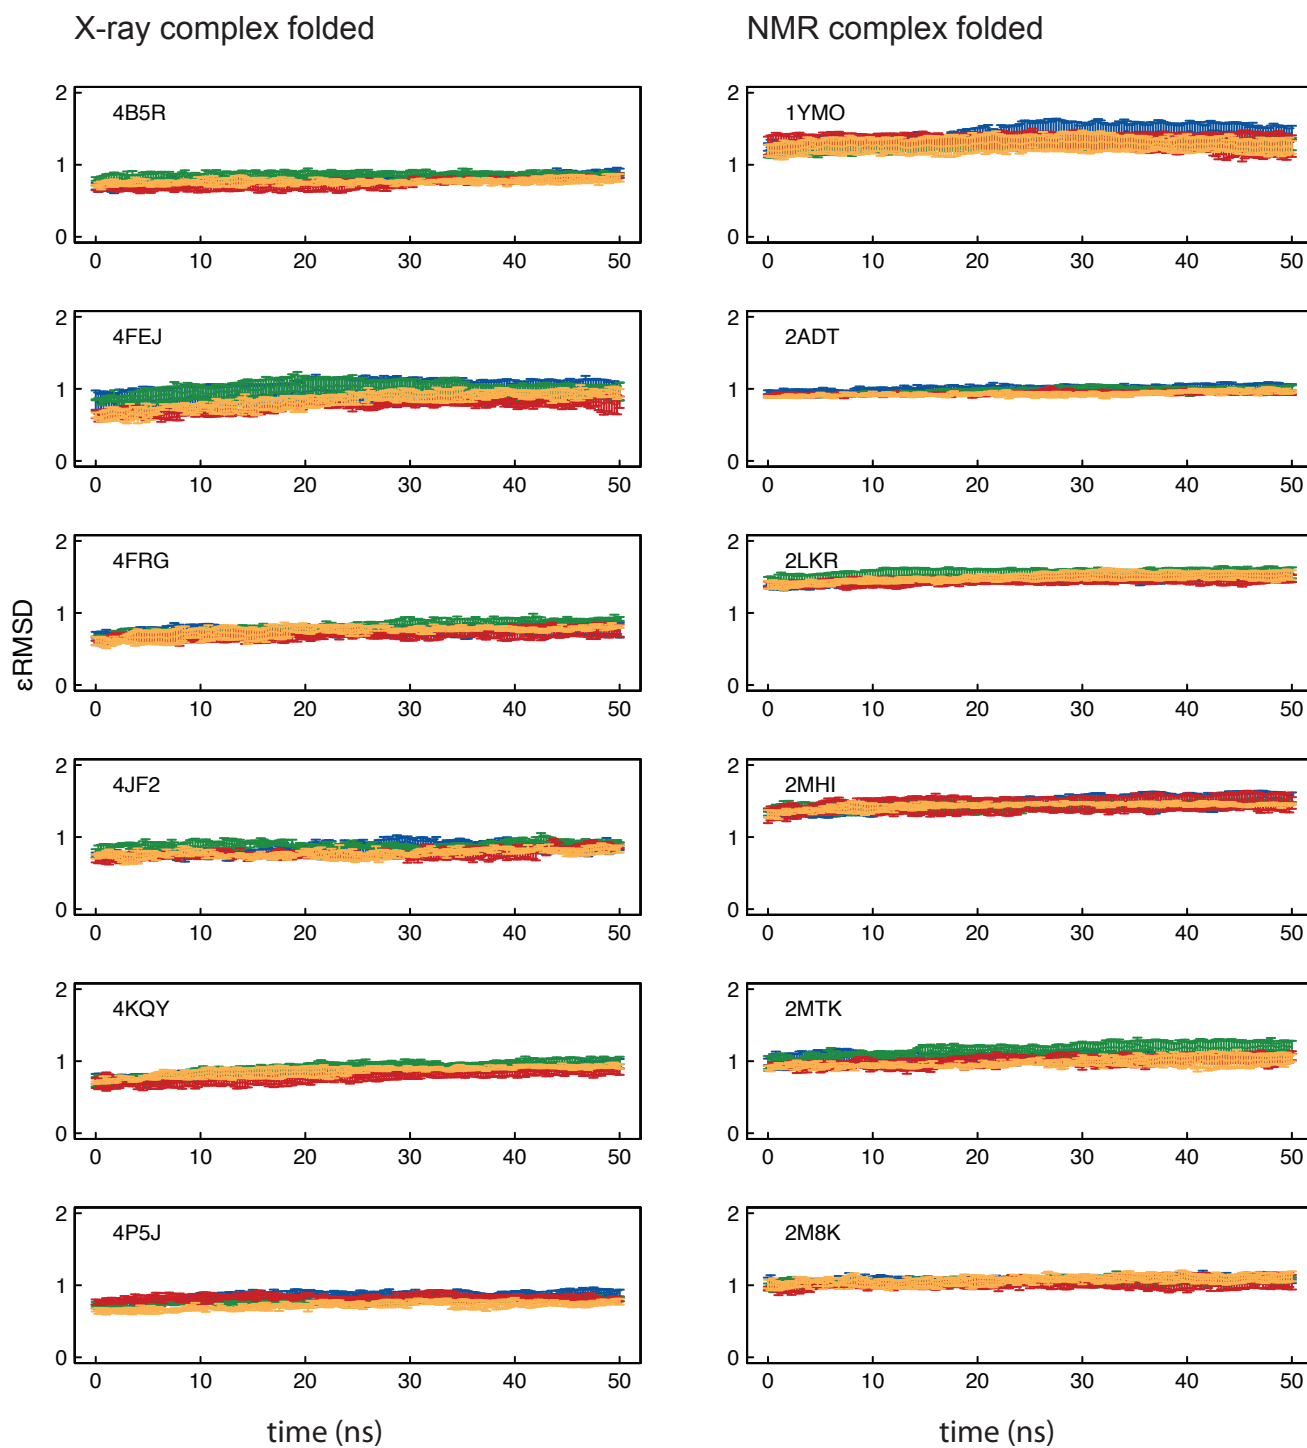

**Figure S7.**  $\epsilon$ RMSD values are calculated to the original PDB structure over 50 ns production runs for three replicas in each system. The average  $\epsilon$ RMSD and its error are shown for each complex folded RNA obtained by X-ray or NMR. The four systems are shown in different colors (as in Fig. 1):  $\text{Na}^+_{\text{Cl}}$  (green),  $\text{Na}^+_{\text{PS}}$  (blue),  $\text{Mg}^{2+}_{\text{Cl}}$  (orange),  $\text{Mg}^{2+}_{\text{PS}}$  (red).

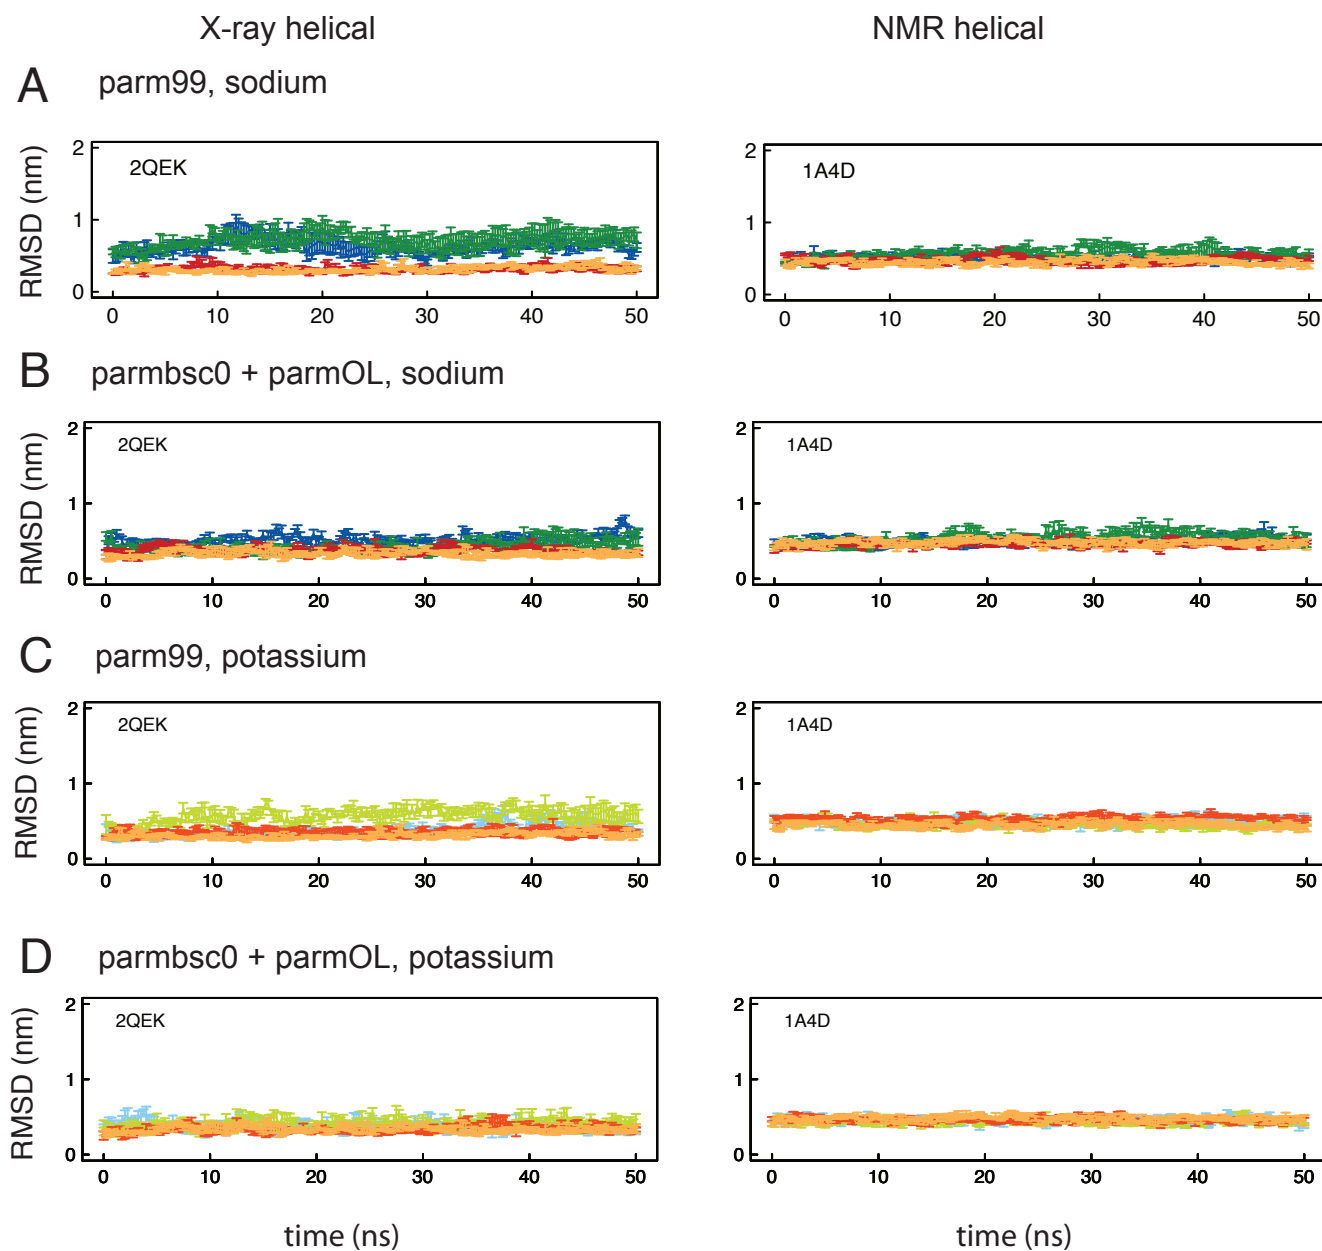

**Figure S8.** RMSD values are calculated to the original PDB structure over 50 ns production runs for three replicas in each system. The average RMSD and its error are shown for two selected helical structures obtained by X-ray (PDB id: 2QEK) or NMR (PDB id: 1A4D). (A) is the same plot as in Fig. S2 using parm99, (B) with parmbc0 and parmOL. For A and B the four systems are shown in different colors (as in Fig. 1):  $\text{Na}^+_{\text{Cl}}$  (green),  $\text{Na}^+_{\text{PS}}$  (blue),  $\text{Mg}^{2+}_{\text{Cl}}$  (orange),  $\text{Mg}^{2+}_{\text{PS}}$  (red). (C) is using parm99 and (D) using parmbc0 and parmOL. For C and D the four systems are shown in lighter colors: (1)  $\text{K}^+$  (light green), (2)  $\text{K}^+$  and KCl (light blue), (3)  $\text{Mg}^{2+}$  (orange), (4)  $\text{Mg}^{2+}$  and KCl (light red).

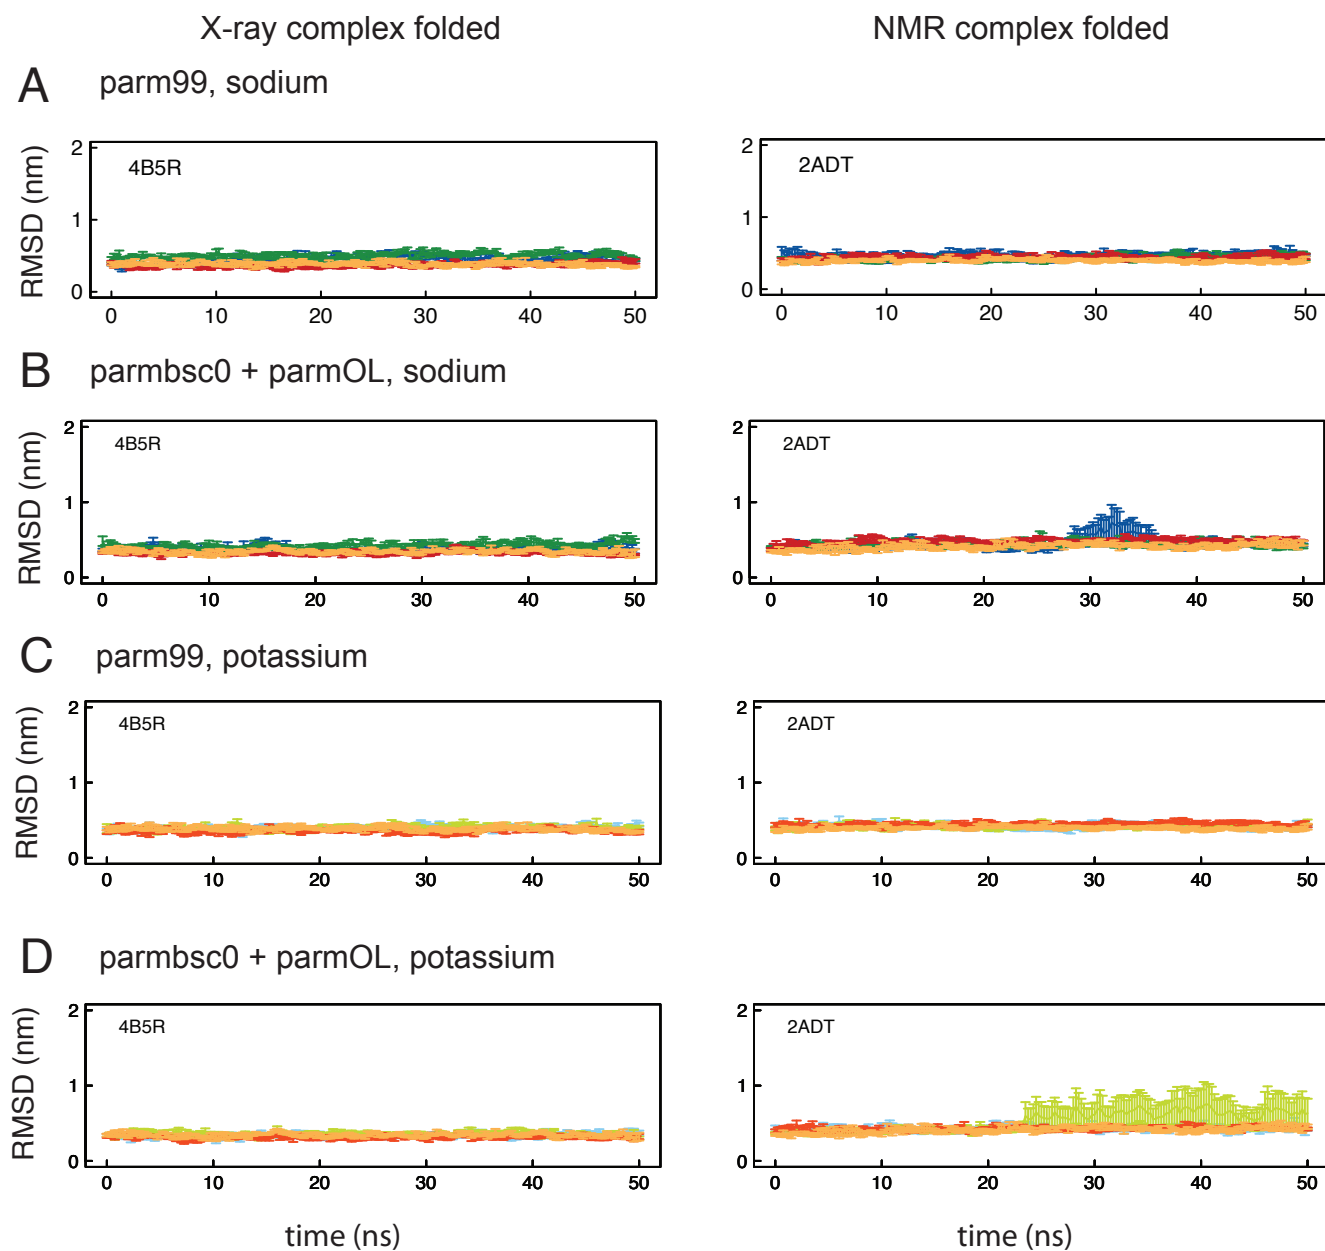

**Figure S9.** RMSD values are calculated to the original PDB structure over 50 ns production runs for three replicas in each system. The average RMSD and its error are shown for two selected complex folded structures obtained by X-ray (PDB id: 4B5R) or NMR (PDB id: 2ADT). (A) is the same plot as in Fig. S2 using parm99, (B) with parmbsc0 and parmOL. For A and B the four systems are shown in different colors (as in Fig. 1):  $\text{Na}^+_{\text{Cl}}$  (green),  $\text{Na}^+_{\text{PS}}$  (blue),  $\text{Mg}^{2+}_{\text{Cl}}$  (orange),  $\text{Mg}^{2+}_{\text{PS}}$  (red). (C) is using parm99 and (D) using parmbsc0 and parmOL. For C and D the four systems are shown in lighter colors: (1)  $\text{K}^+$  (light green), (2)  $\text{K}^+$  and  $\text{KCl}$  (light blue), (3)  $\text{Mg}^{2+}$  (orange), (4)  $\text{Mg}^{2+}$  and  $\text{KCl}$  (light red).

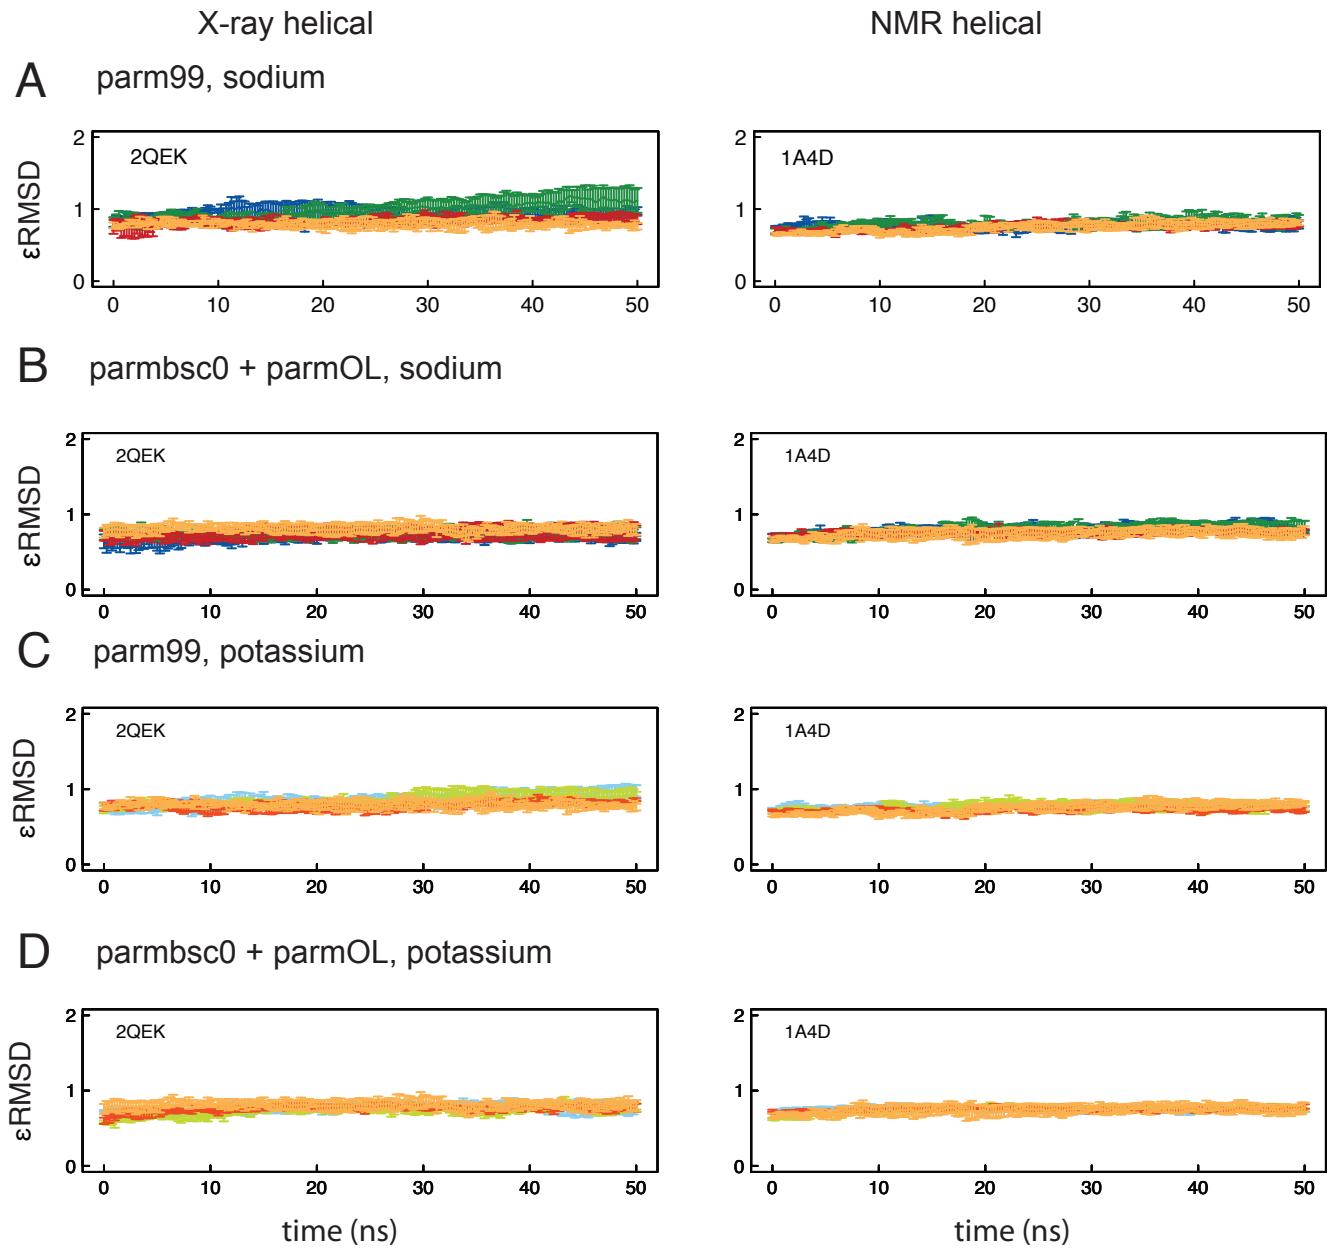

**Figure S10.** eRMSD values are calculated to the original PDB structure over 50 ns production runs for three replicas in each system. The average eRMSD and its error are shown for two selected helical structures obtained by X-ray (PDB id: 2QEK) or NMR (PDB id: 1A4D). (A) is the same plot as in Fig. S2 using parm99, (B) with parmbsc0 and parmOL. For A and B the four systems are shown in different colors (as in Fig. 1): Na<sup>+</sup><sub>Cl</sub> (green), Na<sup>+</sup><sub>PS</sub> (blue), Mg<sup>2+</sup><sub>Cl</sub> (orange), Mg<sup>2+</sup><sub>PS</sub> (red). (C) is using parm99 and (D) using parmbsc0 and parmOL. For C and D the four systems are shown in lighter colors: (1) K<sup>+</sup> (light green), (2) K<sup>+</sup> and KCl (light blue), (3) Mg<sup>2+</sup> (orange), (4) Mg<sup>2+</sup> and KCl (light red).

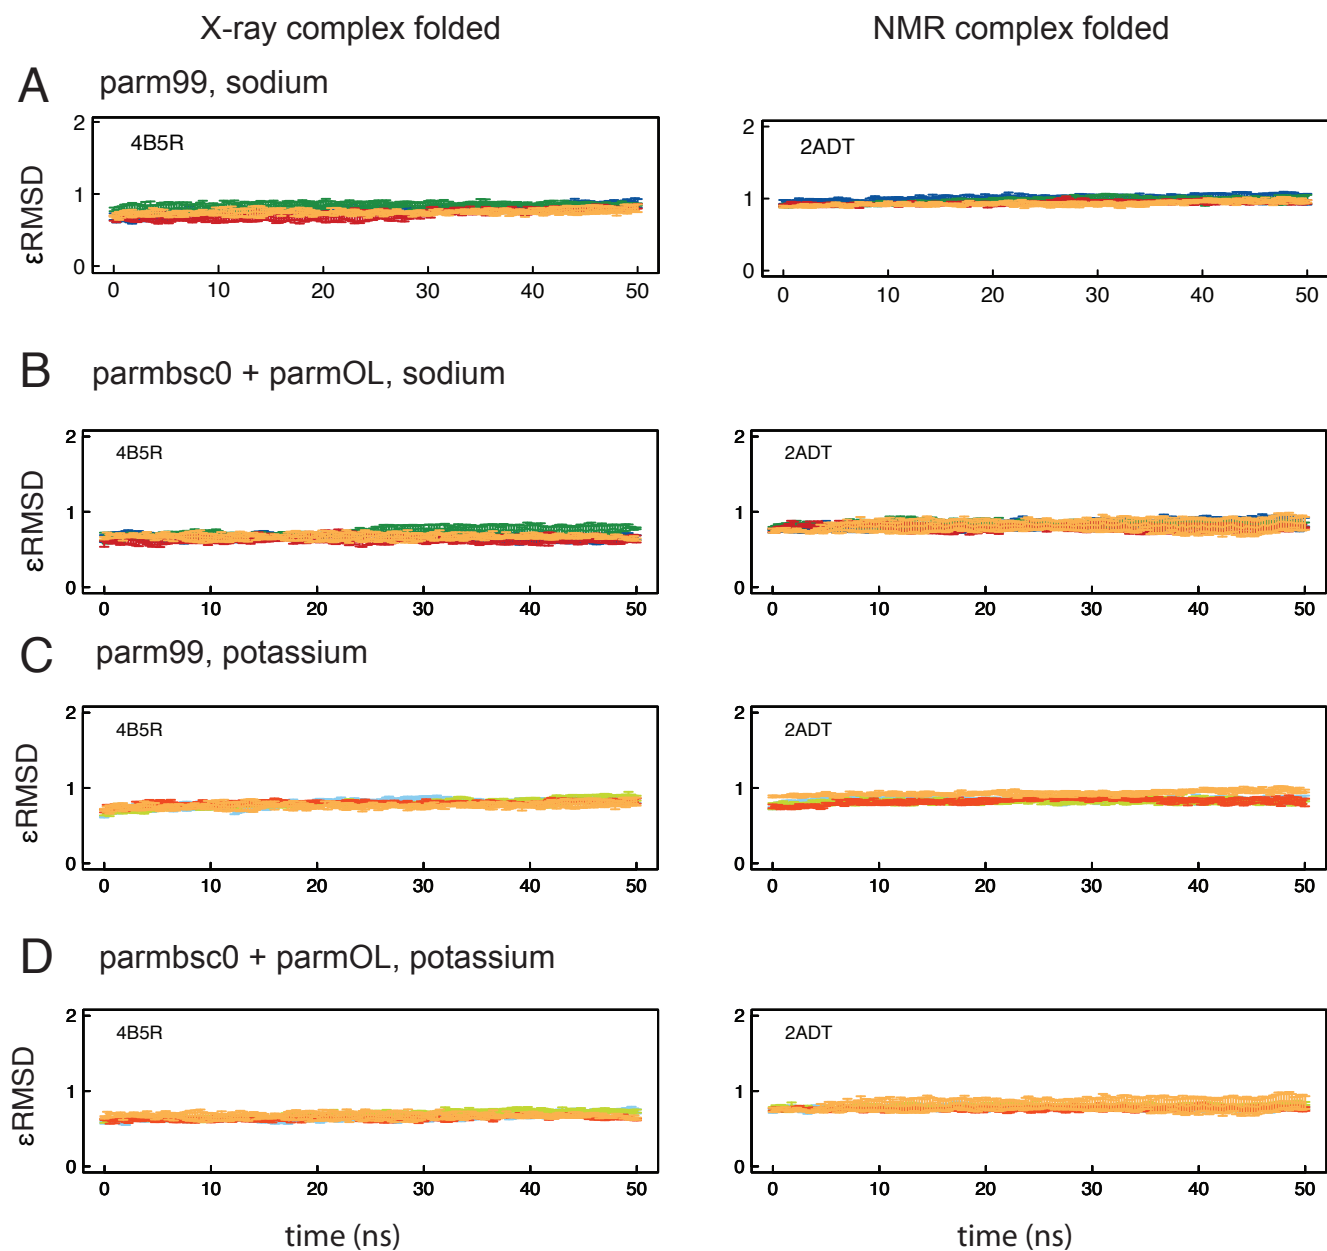

**Figure S11.**  $\epsilon$ RMSD values are calculated to the original PDB structure over 50 ns production runs for three replicas in each system. The average  $\epsilon$ RMSD and its error are shown for two selected complex folded structures obtained by X-ray (PDB id: 4B5R) or NMR (PDB id: 2ADT). (A) is the same plot as in Fig. S2 using parm99, (B) with parmbsc0 and parmOL. For A and B the four systems are shown in different colors (as in Fig. 1):  $\text{Na}^+_{\text{Cl}}$  (green),  $\text{Na}^+_{\text{PS}}$  (blue),  $\text{Mg}^{2+}_{\text{Cl}}$  (orange),  $\text{Mg}^{2+}_{\text{PS}}$  (red). (C) is using parm99 and (D) using parmbsc0 and parmOL. For C and D the four systems are shown in lighter colors: (1)  $\text{K}^+$  (light green), (2)  $\text{K}^+$  and  $\text{KCl}$  (light blue), (3)  $\text{Mg}^{2+}$  (orange), (4)  $\text{Mg}^{2+}$  and  $\text{KCl}$  (light red).

**Table S3.** Average RMSD values (Å) between experimental and predicted binding sites during the equilibration phase. The position of ions are predicted with MobyWat. The resulting top 50 ion positions are considered for each replica.

| System Ion | Na <sup>+</sup> <sub>Cl</sub><br>Na <sup>+</sup> | Na <sup>+</sup> <sub>PS</sub><br>Na <sup>+</sup> | Mg <sup>2+</sup> <sub>Cl</sub><br>Mg <sup>2+</sup> | Mg <sup>2+</sup> <sub>PS</sub><br>Na <sup>+</sup> | Mg <sup>2+</sup> |
|------------|--------------------------------------------------|--------------------------------------------------|----------------------------------------------------|---------------------------------------------------|------------------|
| 1D4R       |                                                  |                                                  |                                                    |                                                   |                  |
| MG-90      | 1.14±0.12                                        | 1.14±0.41                                        | 1.60±0.12                                          | 1.69±1.09                                         | 1.77±0.07        |
| MG-91      | 0.74±0.13                                        | 3.33±3.07                                        | 2.03±0.14                                          | 1.83±1.12                                         | 3.73±1.30        |
| 2MTK       |                                                  |                                                  |                                                    |                                                   |                  |
| MG-48      | 6.03±1.26                                        | 7.70±0.75                                        | 5.17±1.52                                          | 6.13±1.57                                         | 3.72±1.12        |
| MG-49      | 2.59±0.87                                        | 3.39±0.61                                        | 4.25±1.34                                          | 6.69±3.74                                         | 4.09±0.65        |
| MG-50      | 2.94±1.77                                        | 3.12±1.32                                        | 4.27±2.36                                          | 4.93±0.73                                         | 5.12±1.47        |
| MG-51      | 2.55±0.60                                        | 2.60±0.90                                        | 3.87±2.14                                          | 3.81±1.85                                         | 3.17±0.70        |
| MG-52      | 3.36±1.36                                        | 2.37±1.15                                        | 3.87±2.40                                          | 3.36±1.56                                         | 3.50±0.54        |
| MG-53      | 1.50±0.25                                        | 2.49±1.58                                        | 2.26±1.19                                          | 4.67±1.79                                         | 2.37±0.68        |
| 2QEK       |                                                  |                                                  |                                                    |                                                   |                  |
| K-47       | 0.60±0.08                                        | 1.26±1.05                                        | 3.44±1.19                                          | 0.51±0.11                                         | 6.16±3.47        |
| K-48       | 1.65±1.67                                        | 1.20±1.14                                        | 4.24±3.31                                          | 1.01±0.73                                         | 3.71±2.26        |
| MG-49      | 2.86±0.51                                        | 2.22±0.48                                        | 1.32±0.30                                          | 3.22±0.19                                         | 1.07±0.29        |
| K-50       | 0.56±0.06                                        | 1.73±1.02                                        | 2.53±0.06                                          | 1.41±0.85                                         | 3.03±1.92        |
| 4FRG       |                                                  |                                                  |                                                    |                                                   |                  |
| MG-179     | 0.99±0.66                                        | 0.98±0.19                                        | 1.35±0.17                                          | 0.82±0.35                                         | 5.08±1.80        |
| MG-180     | 1.69±0.11                                        | 1.32±0.20                                        | 3.52±0.31                                          | 1.41±0.26                                         | 6.21±0.74        |
| MG-181     | 1.18±0.38                                        | 2.10±0.56                                        | 1.57±0.19                                          | 1.82±0.21                                         | 1.87±0.35        |
| MG-182     | 3.41±0.25                                        | 3.93±0.66                                        | 2.44±1.00                                          | 3.09±0.98                                         | 3.38±1.84        |
| MG-183     | 1.80±0.68                                        | 2.25±2.16                                        | 2.17±0.82                                          | 2.04±0.68                                         | 3.91±1.88        |
| MG-184     | 1.35±0.18                                        | 1.41±0.26                                        | 0.55±0.12                                          | 1.46±0.13                                         | 6.05±0.42        |
| MG-185     | 1.34±0.15                                        | 1.69±0.84                                        | 3.20±0.08                                          | 1.26±0.28                                         | 6.04±0.10        |
| 4JF2       |                                                  |                                                  |                                                    |                                                   |                  |
| MG-94      | 0.46±0.10                                        | 1.43±0.96                                        | 2.30±0.52                                          | 0.56±0.48                                         | 3.39±1.17        |
| MG-95      | 5.51±0.95                                        | 4.76±1.03                                        | 3.58±0.95                                          | 5.43±0.54                                         | 5.20±2.35        |
| MG-96      | 1.19±0.29                                        | 1.47±0.38                                        | 2.81±0.65                                          | 1.14±0.54                                         | 4.62±2.24        |
| MG-97      | 8.46±0.09                                        | 6.78±2.41                                        | 8.25±0.48                                          | 8.26±0.46                                         | 8.56±1.14        |
| 4KQY       |                                                  |                                                  |                                                    |                                                   |                  |
| MG-121     | 2.00±0.20                                        | 2.16±0.14                                        | 4.46±1.39                                          | 1.19±0.60                                         | 8.98±1.62        |
| MG-122     | 4.98±0.47                                        | 2.66±1.91                                        | 2.25±0.20                                          | 4.46±0.71                                         | 2.16±1.14        |
| 4P5J       |                                                  |                                                  |                                                    |                                                   |                  |
| MG-85      | 0.88±0.26                                        | 2.34±0.55                                        | 0.32±0.06                                          | 1.57±0.55                                         | 5.78±0.92        |
| MG-86      | 1.77±0.05                                        | 2.58±1.07                                        | 2.46±0.97                                          | 2.05±0.06                                         | 7.60±1.51        |
